# Supplementary material
Source: PubMed Central journal article supplement (PMC3966128)

0.01

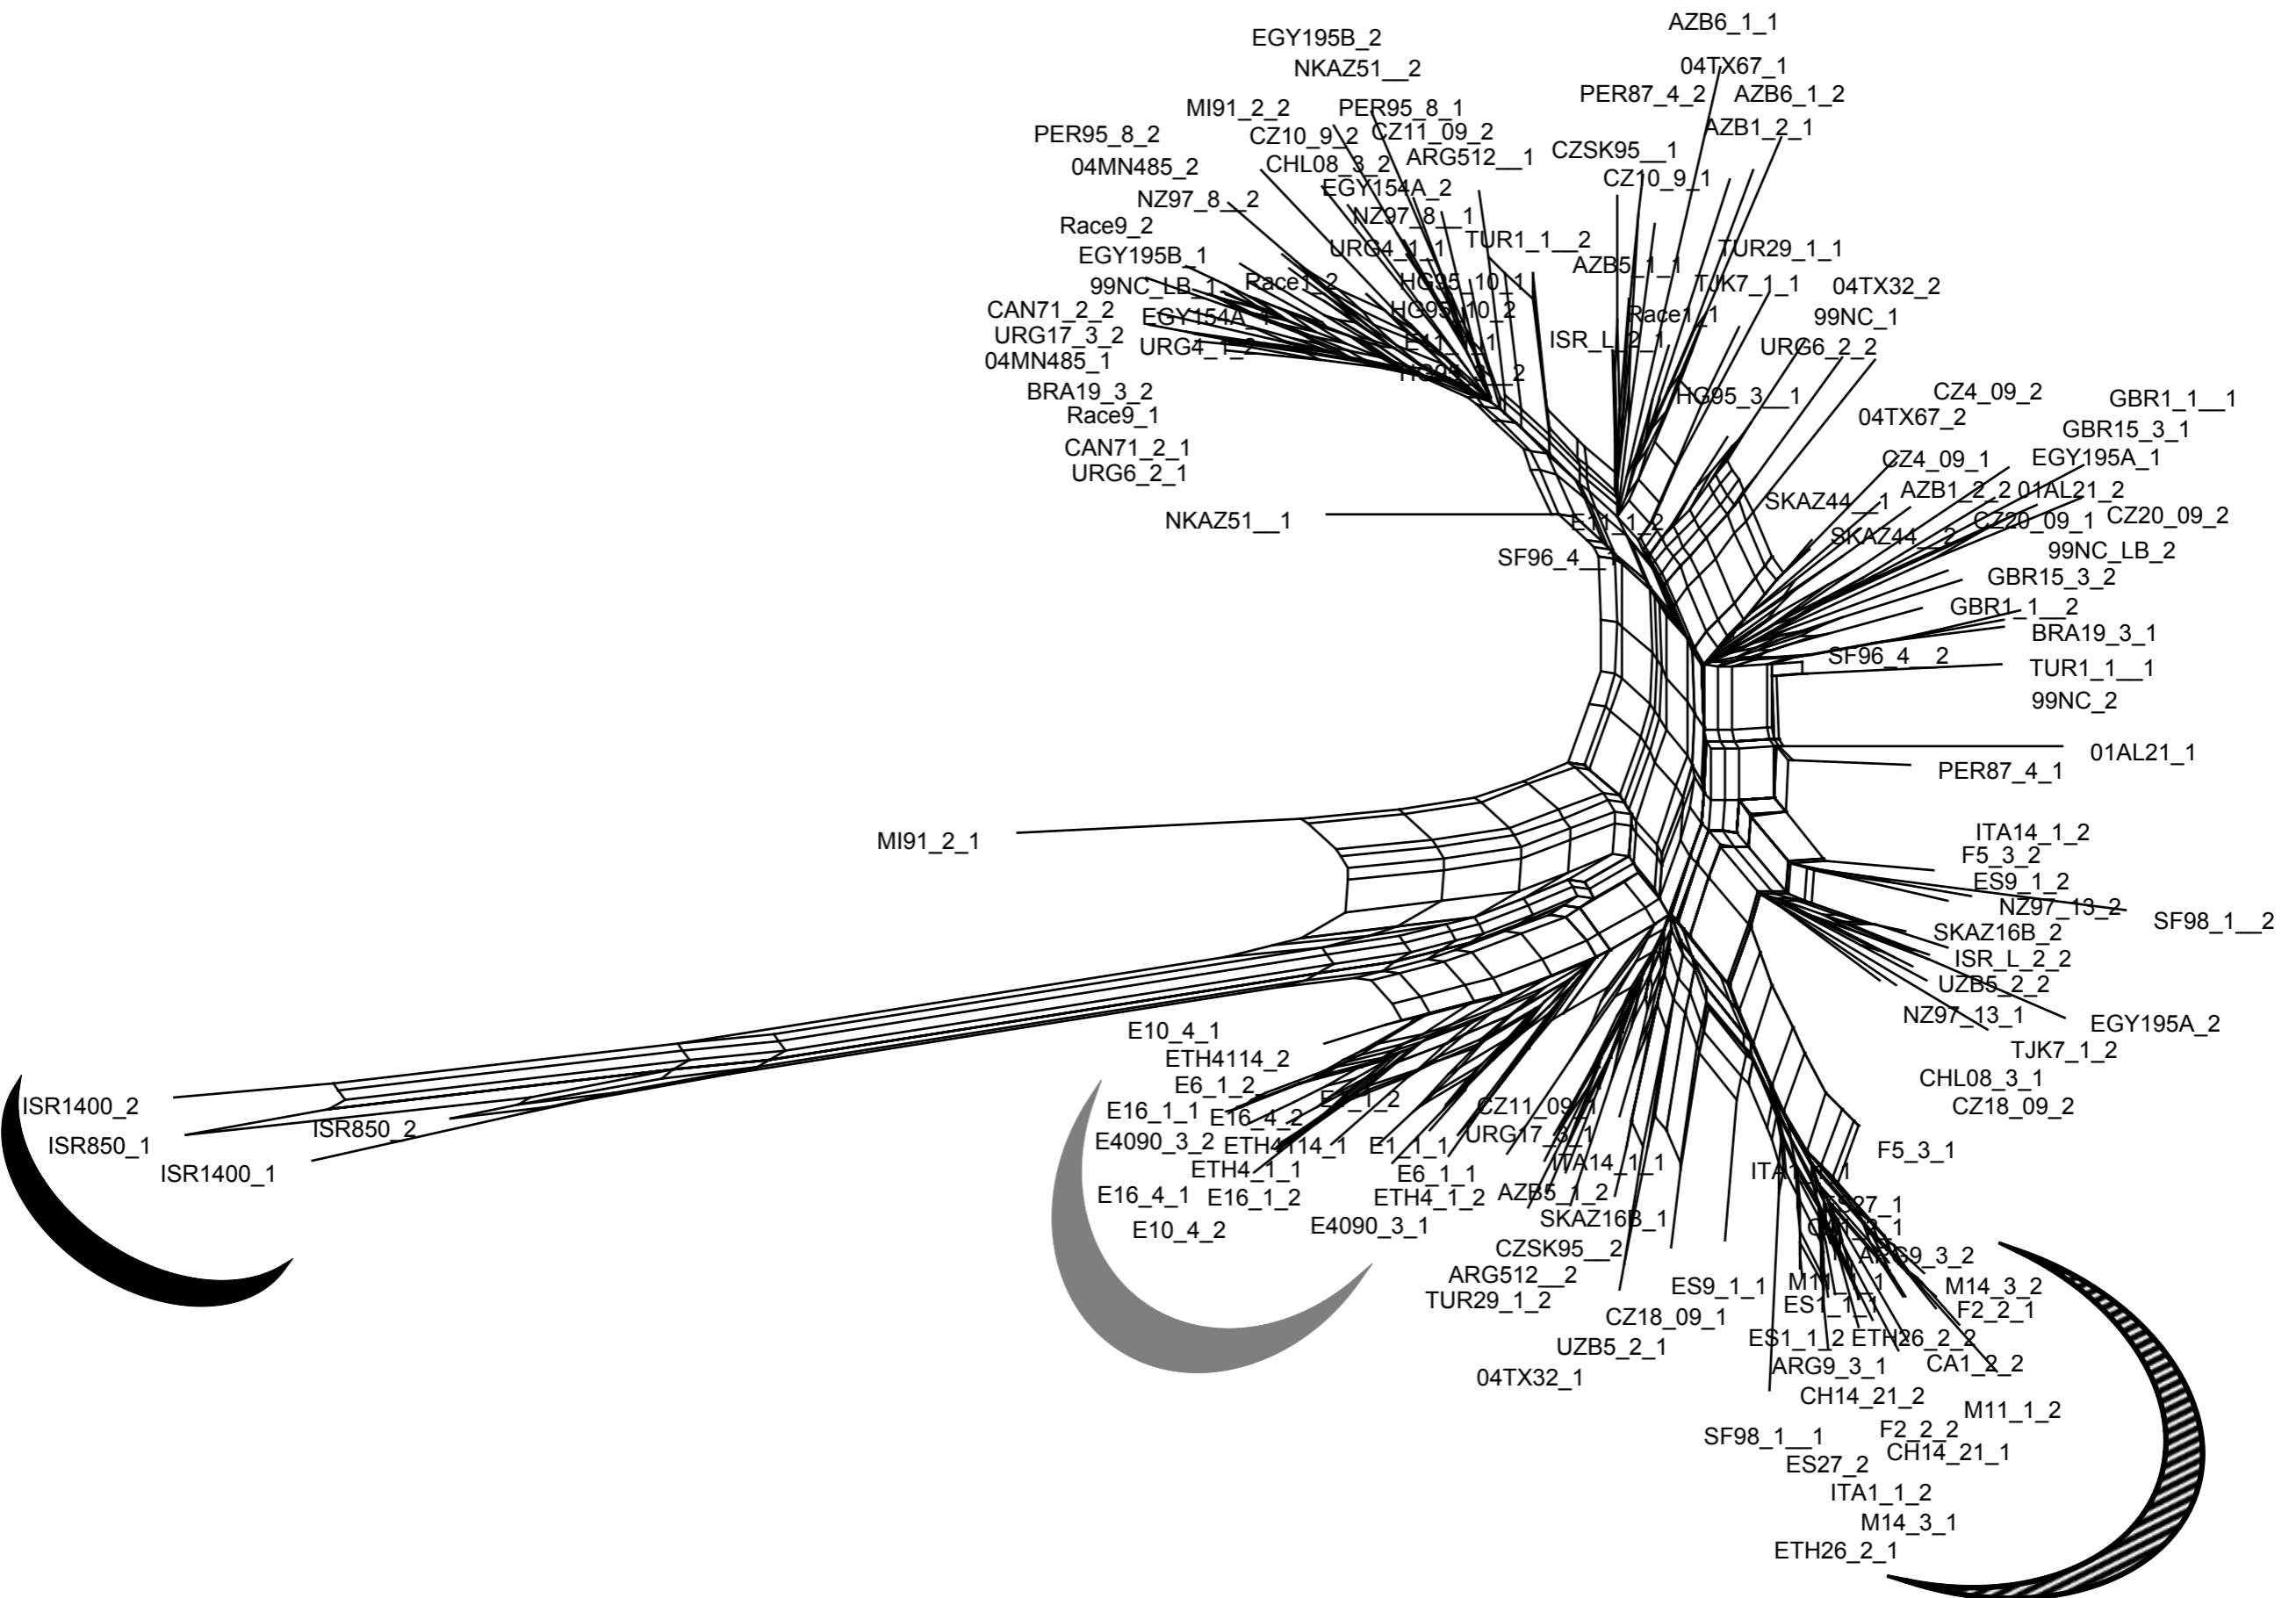

Supplement: hdy2013123x2.pdf [file hdy2013123x2.pdf]
